# Supplementary material
Source: HighWire-hosted journal article supplement (https://bmjopen.bmj.com/content/14/6/e083399)
Supplement: inline-supplementary-material-2 [file inline-supplementary-material-2.pdf]

**Supplementary Table.** Timeline of key study milestones and information collected\*

|                                                        | Visit 1<br>Birth to 60<br>days<br>virtual | Survey 1<br>91 days<br>(3 mo's) | Visit 2<br>120 days<br>(4 mo's)<br>clinic or<br>virtual | Survey 2<br>152 days<br>(5 mo's) | Survey 3<br>182 days<br>(6 mo's) | Visit 3<br>273 Days<br>(9 mo's)<br>clinic or<br>vritual | Visit 4<br>365 days<br>(12 mo's)<br>clinic or<br>home | Survey 4<br>547 days<br>(18 mo's) | Visit 5<br>730 days<br>(24 mo's)<br>clinic or<br>home |
|--------------------------------------------------------|-------------------------------------------|---------------------------------|---------------------------------------------------------|----------------------------------|----------------------------------|---------------------------------------------------------|-------------------------------------------------------|-----------------------------------|-------------------------------------------------------|
| Background/<br>demographic<br>/clinical<br>information | x                                         |                                 |                                                         |                                  |                                  |                                                         |                                                       |                                   |                                                       |
| Feeding<br>recall                                      | x                                         | x                               | x                                                       | x                                | x                                | x                                                       | x                                                     | x                                 | x                                                     |
| Indicators of<br>dietary<br>tolerance                  | x                                         | x                               | x                                                       | x                                | x                                | x                                                       | x                                                     |                                   |                                                       |
| Illness and<br>SAE's                                   |                                           | x                               | x                                                       | x                                | x                                | x                                                       | x                                                     | x                                 | x                                                     |
| Childcare<br>attendance                                | x                                         |                                 | x                                                       |                                  |                                  | x                                                       | x                                                     |                                   | x                                                     |
| Attention<br>Assessment                                |                                           |                                 | x                                                       |                                  |                                  | x                                                       |                                                       |                                   |                                                       |
| Bayley-IV<br>Assessment                                |                                           |                                 |                                                         |                                  |                                  |                                                         | x                                                     |                                   | x                                                     |
| MCDI                                                   |                                           |                                 |                                                         |                                  |                                  |                                                         | x                                                     |                                   | x                                                     |
| ASQ-3                                                  |                                           |                                 |                                                         |                                  | x                                |                                                         |                                                       | x                                 |                                                       |
| Home<br>environment                                    |                                           |                                 |                                                         |                                  |                                  |                                                         | x                                                     |                                   | x                                                     |
| Infant height,<br>weight, head<br>circumferenc<br>e    | x                                         |                                 | x                                                       |                                  |                                  | x                                                       | x                                                     |                                   | x                                                     |

\* Additional phone calls at 4, 7, 14 and 21 days after enrolment collected information on receipt of study formula (where applicable) and feeding recall to monitor early compliance.

ASQ-3: Ages and Stages Questionnaire, Third Edition; Bayley-IV: Bayley Scales of Infant Development, Fourth Edition; MCDI-3: MacArthur-Bates Communicative Development Inventory, Third Edition; SAE: Serious Adverse Event
